# Supplementary material for: A metal–organic framework loaded paper-based chemiluminescence sensor for trace acetone detection in exhaled breath
Source: Royal Society of Chemistry journal article supplement (doi:10.1039/d2ay01025a), 2022-01-01
Supplement: d2ay01025a1.pdf [file d2ay01025a1.pdf]

Dear Editor,

There are three mistakes in EI. They should be revised as below.

1. In S7 of Page 7, “The effect of H<sub>2</sub>SO<sub>4</sub> concentration on the CL intensity was investigated from 10.0-85.0 mM with the fixed concentration of KMnO<sub>4</sub> (2.0 mM) and DNPH (7.0 mM) (Fig. S4 C).” should change to “The effect of H<sub>2</sub>SO<sub>4</sub> concentration on the CL intensity was investigated from 10.0-80.0 mM with the fixed concentration of KMnO<sub>4</sub> (2.0 mM) and DNPH (7.0 mM) (Fig. S4 C).”
2. Reference 8 should change to “[8] L. Q. Yu, F. H. Su, M. Y. Ma and Y. K. Lv, Metal-organic frameworks for the sorption of acetone and isopropanolin exhaled breath of diabetics prior to quantitation by gas chromatography, *Microchim. Acta*, 2019, 186, 588.”
3. Reference 11 should change to “[11] P. Thongsrisomboon, B. Liawruangrath, S. Liawruangrath and S. Satiemperakul, Determination of nitrofurans residues in animal feeds by flow injection chemiluminescence procedure, *Food Chem.*, 2010, 123, 834-839.
